# Supplementary material for: Phosphatidylinositol-phospholipase C2 regulates pattern-triggered immunity in Nicotiana benthamiana
Source: PubMed Central journal article supplement (PMC7410187; doi:10.1093/jxb/eraa233), 2020-05-15
Supplement: eraa233_suppl_supplementary_material.pdf [file eraa233_suppl_supplementary_material.pdf]

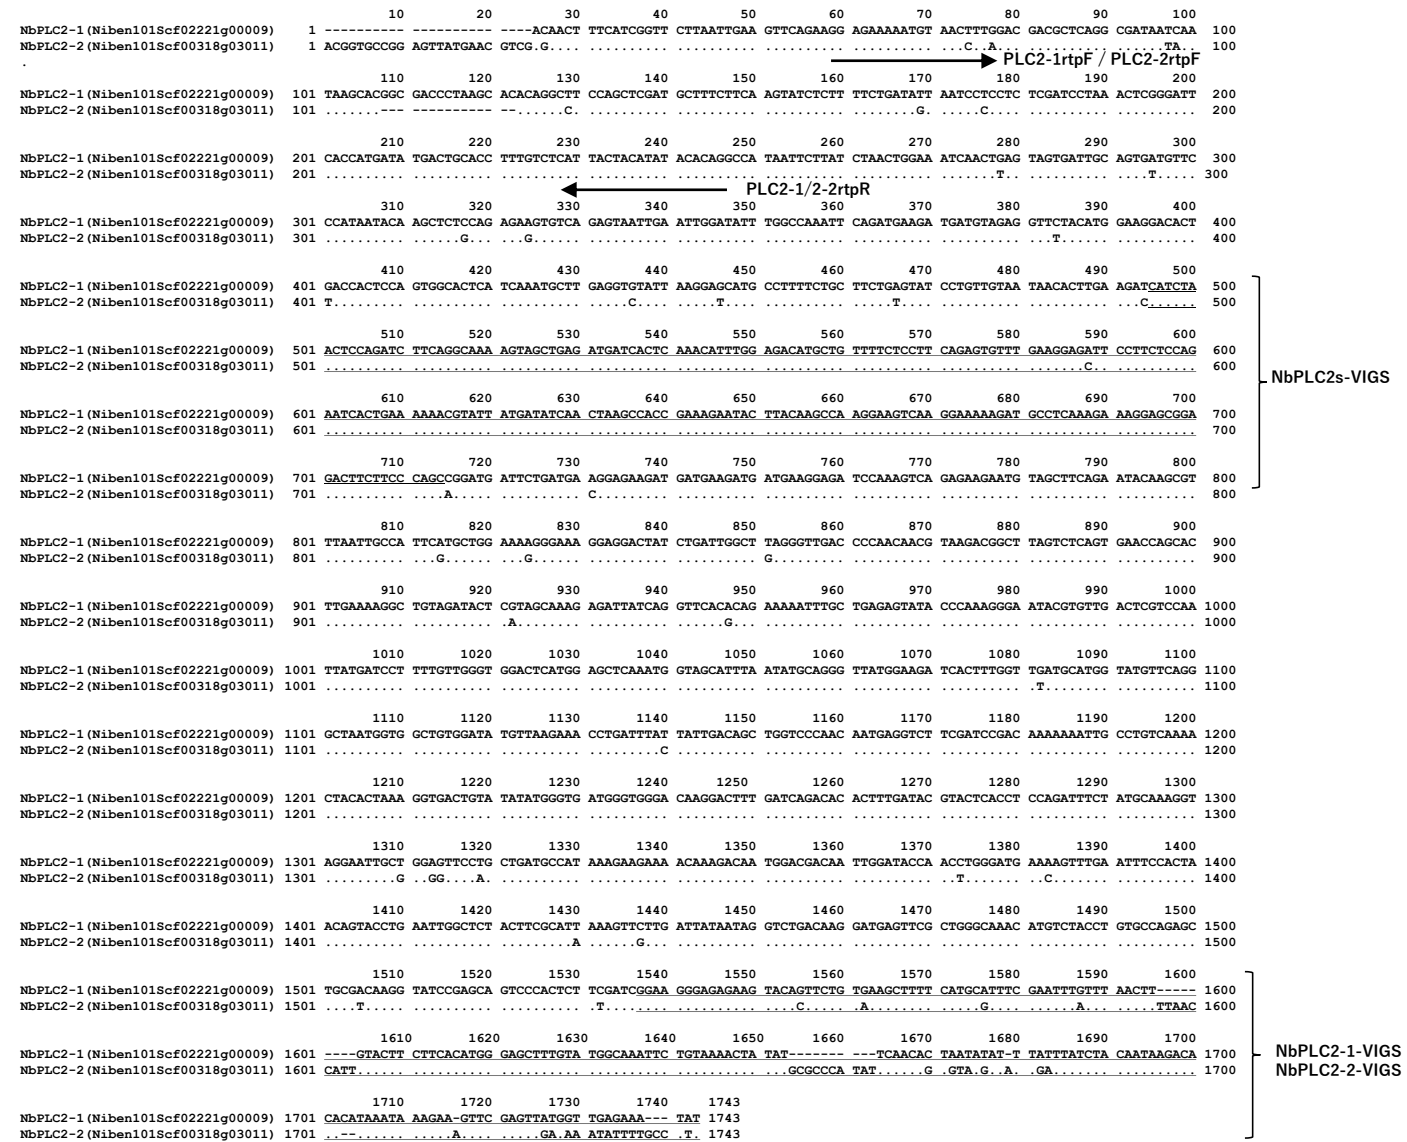

NbPLC2s-VIGS

NbPLC2-1-VIGS  
NbPLC2-2-VIGS

**Figure S2 Nucleotide sequence of *NbPLC2-1* and *NbPLC2-2***

Alignment of nucleotide sequence of *NbPLC2-1* (Niben101Scf02221g00009) and *NbPLC2-2* (Niben101Scf00318g03011). Nucleotide sequence used for virus-induced gene silencing (NbPLC2s-VIGS, NbPLC2-1-VIGS, or NbPLC2-2-VIGS). Arrows indicated nucleotide sequence used for qRT-PCR (PLC2-1/2-2rtpF, PLC2-1rtpR and PLC2-2rtpR).

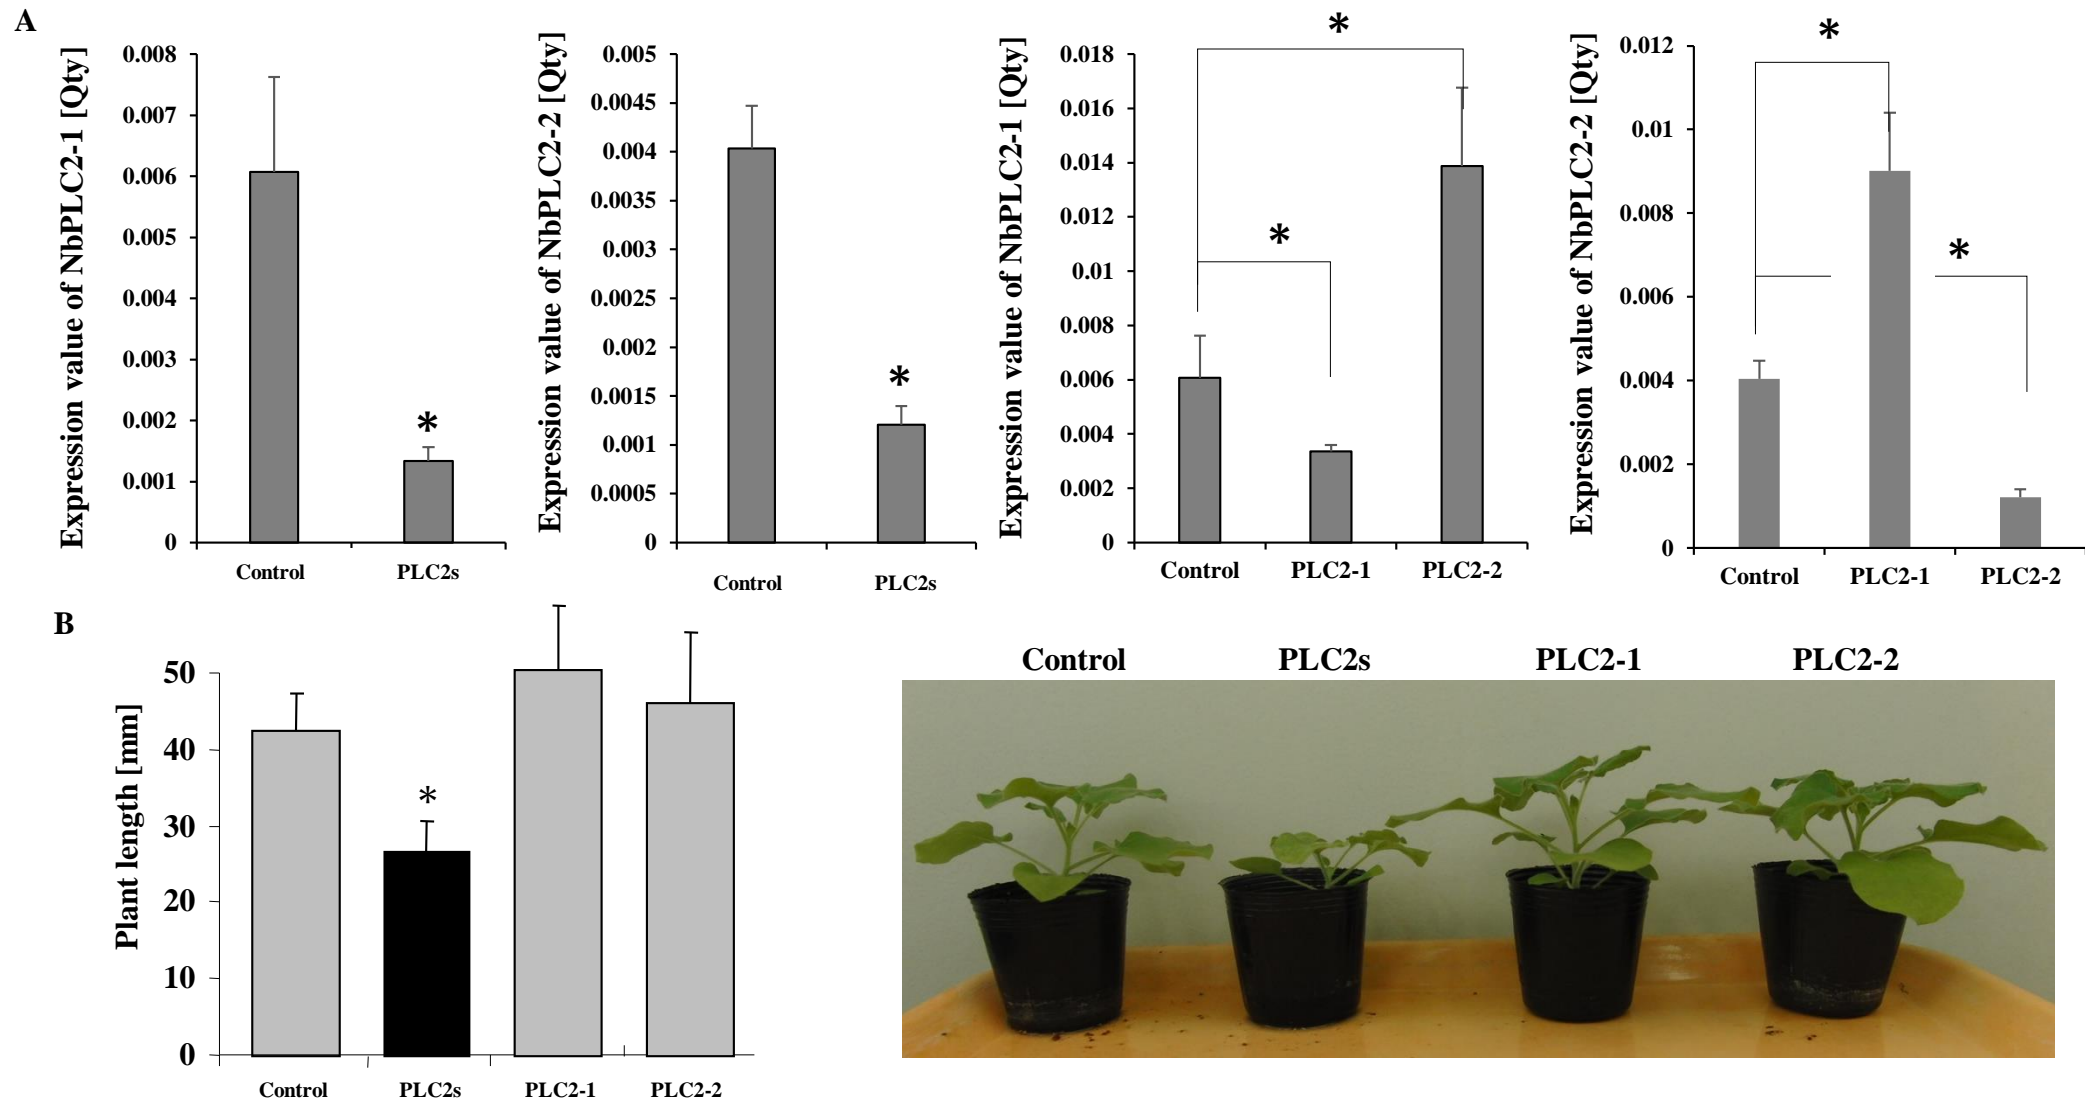

**Figure S3 Phenotypic observation of *NbPLC2s*, *NbPLC2-1* and *NbPLC2-2*-silenced plants.**

(A) Total RNA was isolated from control (Control), *NbPLC2s*-silenced (PLC2s), *NbPLC2-1*-silenced (PLC2-1) and *NbPLC2-2*-silenced (PLC2-2) leaves. Expression values were normalized against actin gene expression levels. Data represent the means and standard deviations from triplicate experiments. (B) Plant length was determined 3 weeks after inoculation with *Agrobacterium tumefaciens*. (C) Photograph was taken 3 weeks after inoculation with *Agrobacterium tumefaciens*. Values represent mean plant length ( $n = 7$ ) with SD. Asterisks denote values significantly different from those of water-inoculated controls (\*;  $P < 0.05$ ,  $t$ -test).

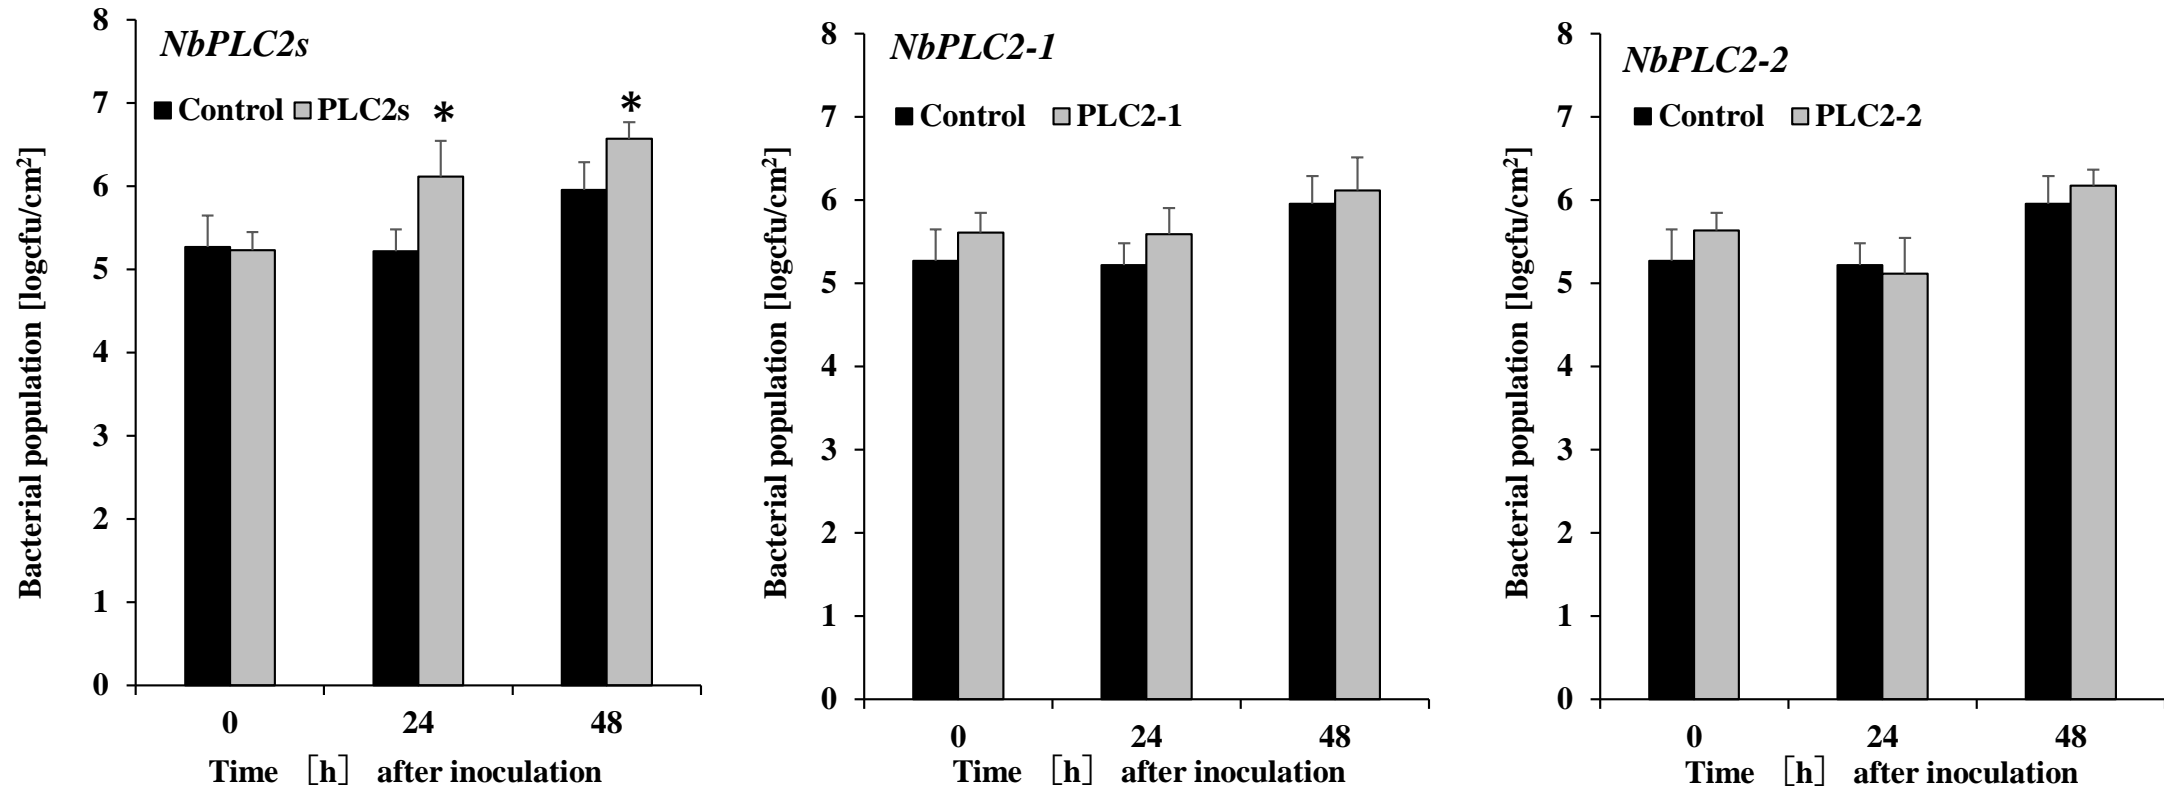

**Figure S4 Response of *NbPLC2s*, *NbPLC2-1* and *NbPLC2-2*-silenced plants against compatible *R. solanacearum*.**

Control and *NbPLC2s*, *NbPLC2-1* and *NbPLC2-2*-silenced plant leaves infiltrated with *R. solanacearum* OE1-1. Bacterial population of *R. solanacearum* OE1-1 was determined by plating at specified time points. Values are means of five replicate experiments with SD. Asterisks denote values significantly different from those of control plants (\*;  $P < 0.05$ , *t*-test).

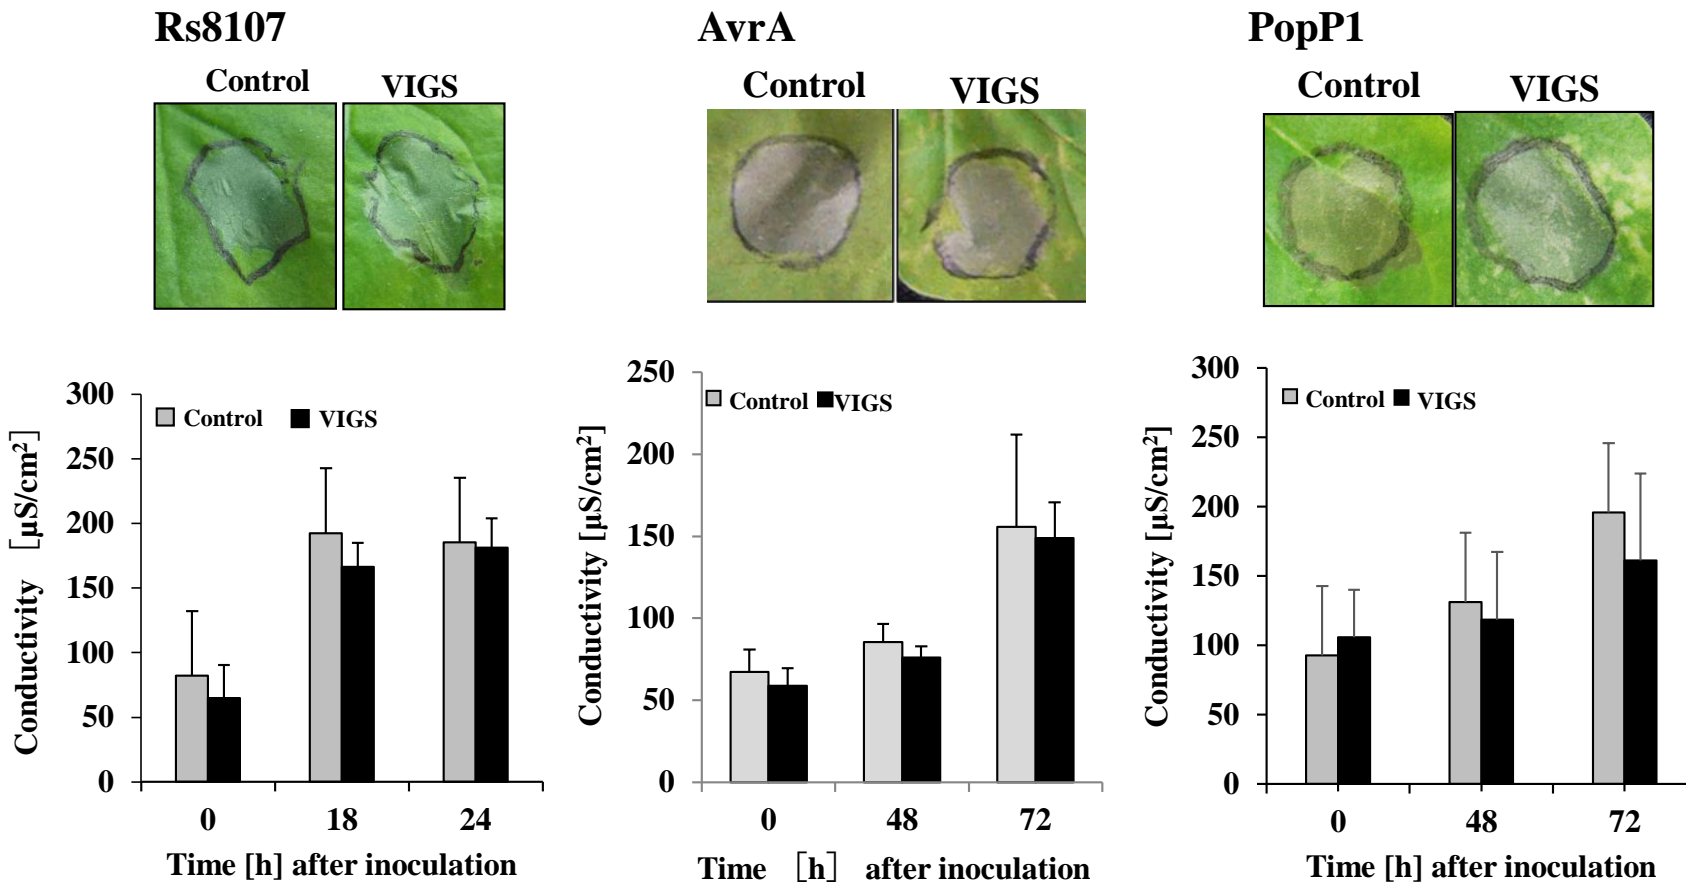

**Figure S5 Effect of *NbPLC2s*-silencing on HR induction by effectors from incompatible *R. solanacearum*.**

Control and *NbPLC2s*-silenced (VIGS) *N. benthamiana* plants were infiltrated with *R. solanacearum* 8107 (Rs8107), HR-inducible *Agrobacterium* harboring 35S-GUS (control GUS), 35S-AvrA (AvrA) and 35S-PopP1 (PopP1). (A) Pictures of *N. benthamiana* leaves taken 1 or 4 days after infiltration with *R. solanacearum* 8107 or *Agrobacterium*, respectively. (B) Cell death was determined by measurement of ion conductivity (leakage). Values represent mean with SD (n=5).

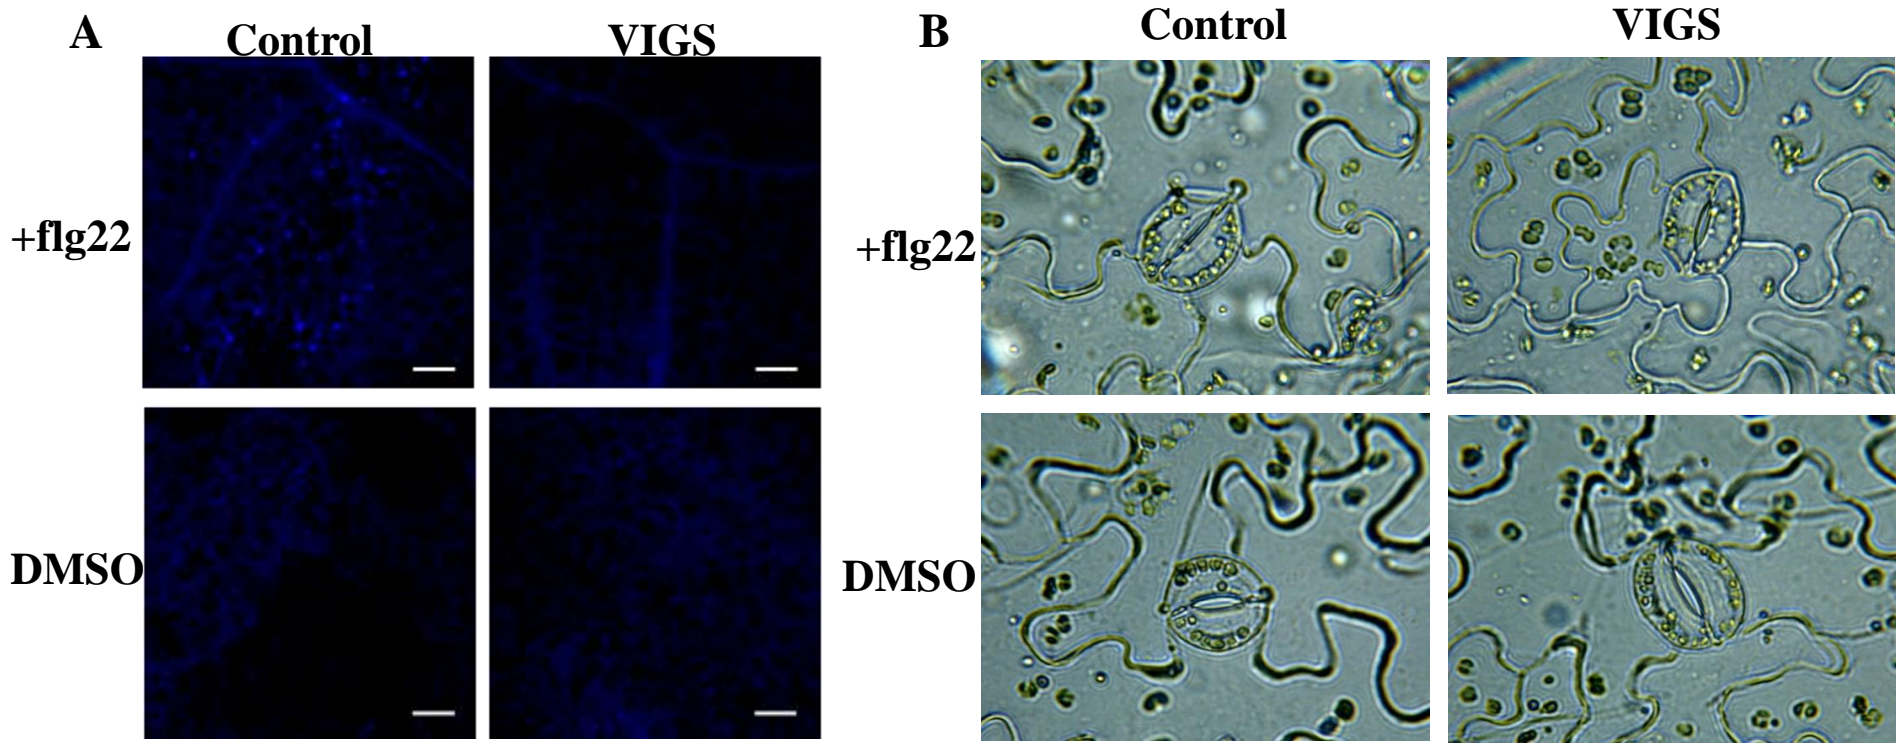

**Figure S6 Characteristic of callose deposition and stomatal closure in *NbPLC2s*-silenced plant.**

Effect of *NbPLC2s*-silencing on flg22-induced stomatal closure and callose deposition. Control and *NbPLC2s*-silenced (VIGS) leaves were treated with flg22 (+flg22) or DMSO (DMSO) solution. Observation of callose deposition (A) and stomatal closure (B) was carried out by the methods described in the materials and methods. Bar indicates 100  $\mu$ m.

Table S1 List of primers used in this study.

| Primers        | Sequence                              | Purpose         |
|----------------|---------------------------------------|-----------------|
| M4             | 5'-GTTTTCCCAGTCACGAC-3'               | Sequencing      |
| RV             | 5'-CAGGAAACAGCTATGGAC-3'              | Sequencing      |
| PLC2s VIGSS    | 5'- GTCGACCATCTAACTCCAGATCTTCAGGC-3'  | For VIGS vector |
| PLC2s VIGSA    | 5'- GTCGACCTTTCTTTGAGGCATCTTTTCC-3'   | For VIGS vector |
| PLC2-1 VIGSS   | 5'- GTCGACGGAAGGGAGAGAAGTACAG-3'      | For VIGS vector |
| PLC2-1 VIGSA   | 5'- GTCGACATATTTCTCAACCATAACTCGAAC-3' | For VIGS vector |
| PLC2-2 VIGSS   | 5'- GTCGACGGAAGGGAGAGAAGTACAC-3'      | For VIGS vector |
| PLC2-2 VIGSA   | 5'- GTCGACGGCAAAATATTTCTCAACTCG-3'    | For VIGS vector |
| PLC2-1rtpF     | 5'- GGAGAAAAATGTAACCTTG-3'            | qRT-PCR         |
| PLC2-2rtpF     | 5'- GGAGAAAAATGTAACCTTA-3'            | qRT-PCR         |
| PLC2-1&2-2rtpR | 5'- CCTGTGTATATGTAGTAATG-3'           | qRT-PCR         |
| NbAcre31rtp F  | 5'- AAGGTCCCCTCTTCGTCGGATCTTCG-3'     | qRT-PCR         |
| NbAcre31rtp R  | 5'- AAGAATTCGGCCATCGTGATCTTGGTC-3'    | qRT-PCR         |
| NbPti5rtp F    | 5'- CCTCCAAGTTTGAGCTCGGATAGT-3'       | qRT-PCR         |
| NbPti5rtp R    | 5'- CCAAGAAATTCTCCATGCACTCTGTC-3'     | qRT-PCR         |
| NbACTrtpF      | 5'-CGGAATCCACGAGACTACATAC-3'          | qRT-PCR         |
| NbACTrtpR      | 5'-GGGAAGCCAAGATAGAGC-3'              | qRT-PCR         |
| PR-4rtpF       | 5'-GGCCAAGATTCCTGTGGTAGAT-3'          | qRT-PCR         |
| PR-4rtpR       | 5'-CACTGTTGTTTGAGTTCCTGTTCCCT-3'      | qRT-PCR         |

Table S2 List of plasmids used in this study.

| Plasmid      | Relevant characteristics                                                                                  | Reference                      |
|--------------|-----------------------------------------------------------------------------------------------------------|--------------------------------|
| pMD20        | Cloning vector pMD20, Amp <sup>r</sup>                                                                    | Takara Bio                     |
| pMD-NbPLC2s  | pMD20 carrying identical sequence of <i>NbPLC2-1</i> and <i>NbPLC2-2</i> fragment for VIGS                | This study                     |
| pMD-NbPLC2-1 | pMD20 carrying <i>NbPLC2-1</i> fragment for VIGS                                                          | This study                     |
| pMD-NbPLC2-2 | pMD20 carrying full length <i>NbPLC2-2</i> fragment for VIGS                                              | This study                     |
| pPVX201      | pPVX binary vector, Km <sup>r</sup>                                                                       | Baulcombe <i>et al.</i> , 1995 |
| pPVXPLC2s    | pPVX binary vector containing identical sequence of <i>NbPLC2-1</i> and <i>NbPLC2-2</i> fragment for VIGS | This study                     |
| pPVXPLC2-1   | pPVX binary vector containing PLC2 -1 cDNA fragment for VIGS                                              | This study                     |
| pPVXPLC2-2   | pPVX binary vector containing PLC2 -2 cDNA fragment for VIGS                                              | This study                     |
| P35S-GUS     | pGreen binary vector carrying $\beta$ -glucuronidase (GUS)                                                | Katou <i>et al.</i> , 2003     |
| P35S-AvrA    | pMDC32-derived plasmid that contains the full-length <i>avrA</i>                                          | Poueymiro <i>et al.</i> 2009   |
| P35S-PopP1   | pAM-PAT-P35S-GW-CFP-derived plasmid that contains the <i>popP1</i>                                        | Poueymiro <i>et al.</i> 2009   |
